# Supplementary material for: The Interplay of Olfaction and Vision in Host Plant Selection by Anthrenus verbasci
Source: Research Square preprint supplement (doi:10.21203/rs.3.rs-7100339/v1), 2025-08-06
Supplement: Supplementary file 1 [file 36cd88ca1dc5125461168b80.docx]

**Supplementary Information for the manuscript titled:**

**The Interplay of Olfaction and Vision in Host Plant Selection by *Anthrenus verbasci***

**Authors and affiliations:**

FERENC DEUTSCH and SÁNDOR KECSKEMÉTI,

*Department of Chemical Ecology, Plant Protection Institute, Centre for Agricultural Research, HUN-REN, Budapest, Hungary*

**Corresponding author: kecskemeti.sandor@atk.hun-ren.hu*

ORCID information:

Ferenc Deutsch: 0000-0002-7625-6227

Sándor Kecskeméti: 0000-0002-3952-8174

**Table S1**: List of compounds detected and identified in the headspace sample of intact and cut *A. podagraria* umbels using GC-MS. Detected compounds are in ascending order based on calculated Kovats retention indices (Ria) and NIST library records (RIb).

|  |  |  |  |  |  | **Relative area of Aegopodes podagraria** | |
| --- | --- | --- | --- | --- | --- | --- | --- |
| **#** | **RIa** | **RIb** | **RT** | **Compound Names** | **CAS** | **Cut Umbels** | **Intact Umbels** |
| **1.** |  | 761 | 2.99 | unknown compound |  | 0 | 0.01 ± 0.00 |
| **2.** |  | 768 | 3.08 | sec-butyl acetate | 105-46-4 | 0 | 0.02 ± 0.00 |
| **3.** |  | 773 | 3.14 | unknown compound |  | 0 | 0.01 ± 0.00 |
| **4.** | 770 | 777 | 3.19 | toluene | 108-88-3 | 0.03 ± 0.00 | 0.05 ± 0.00 |
| **5.** | 784 | 788 | 3.34 | 3-hexanone | 589-38-8 | 0.11 ± 0.01 | 0.05 ± 0.00 |
| **6.** | 788 | 791 | 3.38 | 2-hexanone | 591-78-6 | 0.12 ± 0.02 | 0.04 ± 0.00 |
| **7.** | 797 | 795 | 3.44 | 3-hexanol | 623-37-0 | 0.12 ± 0.01 | 0.02 ± 0.00 |
| **8.** | 803 | 800 | 3.49 | 2-hexanol | 626-93-7 | 0.16 ± 0.01 | 0.07 ± 0.01 |
| **9.** |  | 815 | 3.69 | siloxane residue |  | 0.05 ± 0.00 | 0.02 ± 0.00 |
| **10.** |  | 819 | 3.74 | siloxane residue |  | 0.24 ± 0.05 | 0.01 ± 0.00 |
| **11.** |  | 820 | 3.76 | siloxane residue |  | 0.07 ± 0.01 | 0 |
| **12.** | 855 | 854 | 4.2 | 3-hexen-1-ol | 544-12-7 | 0.02 ± 0.00 | 0.01 ± 0.00 |
| **13.** |  | 862 | 4.3 | unknown compound |  | 0.02 ± 0.00 | 0.01 ± 0.00 |
| **14.** | 867 | 865 | 4.34 | 1-hexanol | 111-27-3 | 0.02 ± 0.00 | 0.01 ± 0.00 |
| **15.** | 866 | 870 | 4.41 | *p*-xylene | 106-42-3 | 0.02 ± 0.00 | 0.02 ± 0.00 |
| **16.** |  | 872 | 4.44 | unknown compound |  | 0.01 ± 0.00 | 0 |
| **17.** |  | 874 | 4.46 | unknown compound |  | 0 | 0.01 ± 0.00 |
| **18.** |  | 883 | 4.58 | unknown compound |  | 0 | 0.01 ± 0.00 |
| **19.** | 902 | 902 | 4.82 | heptanal | 111-71-7 | 0.01 ± 0.00 | 0.01 ± 0.00 |
| **20.** | 926 | 926 | 5.18 | tricyclene | 508-32-7 | 0.02 ± 0.00 | 0.03 ± 0.00 |
| **21.** | 920 | 929 | 5.23 | *β*-thujene | 28634-89-1 | 1.54 ± 0.15 | 1.42 ± 0.15 |
| **22.** | 939 | 937 | 5.35 | *α*-pinene | 80-56-8 | 8.27 ± 0.45 | 9.29 ± 0.62 |
| **23.** | 955 | 953 | 5.58 | camphene | 79-92-5 | 0.39 ± 0.02 | 0.32 ± 0.01 |
| **24.** |  | 958 | 5.66 | unknown compound |  | 0 | 0.02 ± 0.00 |
| **25.** | 960 | 963 | 5.74 | benzaldehyde | 100-52-7 | 0.02 ± 0.00 | 0.01 ± 0.00 |
| **26.** | 977 | 977 | 5.94 | sabinene | 3387-41-5 | 2.58 ± 0.09 | 2.52 ± 0.27 |
| **27.** | 980 | 982 | 6.02 | *β*-pinene | 18172-67-3 | 15.27 ± 1.22 | 16.28 ± 1.89 |
| **28.** | 993 | 992 | 6.16 | *β*-myrcene | 123-35-3 | 8.93 ± 0.69 | 7.15 ± 0.86 |
| **29.** | 1001 | 1003 | 6.33 | octanal | 124-13-0 | 0.04 ± 0.01 | 0.06 ± 0.00 |
| **30.** | 1012 | 1008 | 6.4 | *α*-phellandrene | 99-83-2 | 1.06 ± 0.04 | 0.73 ± 0.06 |
| **31.** | 1013 | 1014 | 6.5 | 3-carene | 13466-78-9 | 0.01 ± 0.00 | 0.01 ± 0.00 |
| **32.** | 1019 | 1020 | 6.59 | *α*-terpinene | 99-86-5 | 0.14 ± 0.02 | 0.05 ± 0.01 |
| **33.** | 1024 | 1028 | 6.71 | *p*-cymene | 99-87-6 | 0.16 ± 0.01 | 0.08 ± 0.01 |
| **34.** | 1032 | 1034 | 6.8 | limonene | 5989-27-5 | 25.92 ± 1.01 | 17.81 ± 1.31 |
| **35.** | 1041 | 1038 | 6.87 | (*Z*)-*β*-ocimene | 3338-55-4 | 2.65 ± 0.04 | 1.72 ± 0.09 |
| **36.** | 1044 | 1046 | 7 | benzeneacetaldehyde | 122-78-1 | 0.16 ± 0.02 | 0 |
| **37.** | 1052 | 1049 | 7.04 | (*E*)-β-ocimene | 3779-61-1 | 0.85 ± 0.10 | 0.53 ± 0.03 |
| **38.** |  | 1058 | 7.17 | unknown compound |  | 0.02 ± 0.00 | 0.01 ± 0.00 |
| **39.** | 1062 | 1062 | 7.24 | γ-terpinene | 99-85-4 | 0.23 ± 0.02 | 0.10 ± 0.01 |
| **40.** |  | 1070 | 7.37 | unknown compound |  | 0.01 ± 0.00 | 0 |
| **41.** | 1089 | 1092 | 7.7 | terpinolene | 586-62-9 | 0.17 ± 0.01 | 0.06 ± 0.00 |
| **42.** | 1099 | 1100 | 7.82 | linalool | 78-70-6 | 0.10 ± 0.01 | 0.04 ± 0.00 |
| **43.** | 1104 | 1105 | 7.89 | nonanal | 124-19-6 | 0.04 ± 0.01 | 0.02 ± 0.00 |
| **44.** | 1110 | 1110 | 7.98 | 1-octen-3-yl-acetate | 198242 | 0.07 ± 0.00 | 0 |
| **45.** | 1114 | 1117 | 8.07 | 4,8-dimethyl-1,3,7-nonatriene (DMNT) | 51911-82-1 | 0.01 ± 0.00 | 0 |
| **46.** | 1124 | 1123 | 8.16 | 3-octanol, acetate | 4864-61-3 | 0.02 ± 0.00 | 0.01 ± 0.00 |
| **47.** | 1131 | 1131 | 8.28 | (4*E*,6*Z*)-allo-ocimene | 7216-56-0 | 0.05 ± 0.00 | 0.02 ± 0.00 |
| **48.** |  | 1138 | 8.39 | unknown compound |  | 0.01 ± 0.00 | 0 |
| **49.** | 1147 | 1146 | 8.5 | 2,6-dimethyl-1,3,5,7-octatetraene |  | 0.02 ± 0.00 | 0.01 ± 0.00 |
| **50.** |  | 1152 | 8.6 | siloxane residue |  | 0.02 ± 0.00 | 0.01 ± 0.00 |
| **51.** | 1154 | 1155 | 8.64 | lilac aldehyde B | 53447-45-3 | 0.01 ± 0.00 | 0 |
| **52.** | 1168 | 1168 | 8.84 | benzaldehyde, 3-ethyl- | 34246-54-3 | 0.13 ± 0.01 | 0 |
| **53.** | 1206 | 1184 | 9.07 | benzaldehyde, 4-ethyl- | 4748-78-1 | 0.06 ± 0.01 | 0 |
| **54.** |  | 1191 | 9.18 | unknown compound |  | 0.02 ± 0.00 | 0.01 ± 0.00 |
| **55.** | 1200 | 1199 | 9.29 | dodecane |  | 0.01 ± 0.00 | 0.01 ± 0.00 |
| **56.** |  | 1207 | 9.4 | unknown compound |  | 0.03 ± 0.00 | 0.02 ± 0.00 |
| **57.** | 1259 | 1257 | 10.11 | linalool acetate | 115-95-7 | 0.18 ± 0.01 | 0.06 ± 0.00 |
| **58.** |  | 1263 | 10.19 | unknown compound |  | 0.03 ± 0.00 | 0.01 ± 0.00 |
| **59.** |  | 1269 | 10.28 | unknown compound |  | 0.09 ± 0.01 | 0 |
| **60.** |  | 1281 | 10.45 | unknown compound |  | 0.02 ± 0.00 | 0.01 ± 0.00 |
| **61.** | 1281 | 1289 | 10.56 | ethanone, 1-(4-ethylphenyl)- | 937-30-4 | 0.04 ± 0.00 | 0 |
| **62.** | 1286 | 1292 | 10.61 | bornyl acetate | 76-49-3 | 0.23 ± 0.01 | 0.06 ± 0.00 |
| **63.** | 1300 | 1300 | 10.71 | tridecane | 629-50-5 | 0.06 ± 0.01 | 0.04 ± 0.00 |
| **64.** | 1300 | 1306 | 10.8 | trans-pinocarvyl acetate | 1686-15-3 | 0.05 ± 0.00 | 0.01 ± 0.00 |
| **65.** |  | 1321 | 11 | unknown compound |  | 0.12 ± 0.01 | 0 |
| **66.** |  | 1325 | 11.05 | siloxane residue |  | 0.05 ± 0.01 | 0 |
| **67.** |  | 1326 | 11.07 | unknown compound |  | 0 | 0.01 ± 0.00 |
| **68.** |  | 1337 | 11.21 | unknown compound |  | 0.01 ± 0.00 | 0 |
| **69.** |  | 1347 | 11.34 | elemen isomer |  | 0.09 ± 0.01 | 0.02 ± 0.00 |
| **70.** | 1345 | 1359 | 11.5 | *α*-cubebene | 17699-14-8 | 0.02 ± 0.00 | 0 |
| **71.** |  | 1364 | 11.58 | unknown compound |  | 0.06 ± 0.00 | 0 |
| **72.** | 1373 | 1381 | 11.8 | cyclosativene | 22469-52-9 | 0.03 ± 0.00 | 0.01 ± 0.00 |
| **73.** | 1373 | 1383 | 11.83 | ylangene | 14912-44-8 | 0.01 ± 0.00 | 0 |
| **74.** | 1377 | 1387 | 11.88 | copaene | 3856-25-5 | 0.19 ± 0.01 | 0.07 ± 0.01 |
| **75.** | 1389 | 1392 | 11.94 | 1-tetradecene | 1120-36-1 | 0.04 ± 0.00 | 0.01 ± 0.00 |
| **76.** |  | 1394 | 11.98 | unknown compound |  | 0.02 ± 0.00 | 0 |
| **77.** | 1391 | 1401 | 12.07 | *β*-elemen | 515-13-9 | 0.49 ± 0.06 | 0.12 ± 0.01 |
| **78.** |  | 1406 | 12.14 | unknown compound |  | 0.02 ± 0.00 | 0 |
| **79.** |  | 1410 | 12.17 | unknown compound |  | 0.02 ± 0.00 | 0 |
| **80.** |  | 1411 | 12.19 | unknown compound |  | 0 | 0.00 ± 0.00 |
| **81.** |  | 1415 | 12.25 | unknown compound |  | 0.01 ± 0.00 | 0 |
| **82.** |  | 1423 | 12.35 | unknown compound |  | 0.01 ± 0.00 | 0.00 ± 0.00 |
| **83.** | 1420 | 1435 | 12.49 | *β*-caryophyllene | 87-44-5 | 0.41 ± 0.05 | 0.10 ± 0.01 |
| **84.** | 1430 | 1443 | 12.6 | *β*-copaene | 18252-44-3 | 0.14 ± 0.02 | 0.03 ± 0.00 |
| **85.** | 1432 | 1448 | 12.66 | *β*-gurjurene | 17334-55-3 | 0.04 ± 0.01 | 0.01 ± 0.00 |
| **86.** |  | 1451 | 12.7 | unknown compound |  | 0.02 ± 0.00 | 0 |
| **87.** | 1455 | 1460 | 12.8 | (*Z)*-*β*-farnesene | 28973-97-9 | 2.40 ± 0.22 | 0.78 ± 0.09 |
| **88.** | 1456 | 1469 | 12.92 | *α*-caryophyllene | 6753-98-6 | 0.63 ± 0.03 | 0.20 ± 0.02 |
| **89.** | 1478 | 1478 | 13.03 | (Z)-muurola-4(15),5-diene | 157477-72-0 | 0.13 ± 0.01 | 0.02 ± 0.00 |
| **90.** | 1479 | 1489 | 13.17 | *γ*-muurolene | 30021-74-0 | 0.12 ± 0.01 | 0.01 ± 0.00 |
| **91.** | 1485 | 1496 | 13.27 | germacrene D | 23986-74-5 | 14.94 ± 0.16 | 2.91 ± 0.42 |
| **92.** | 1507 | 1511 | 13.45 | *α*-farnesene | 502-61-4 | 7.14 ± 0.42 | 1.35 ± 0.09 |
| **93.** |  | 1521 | 13.56 | unknown compound |  | 0.02 ± 0.00 | 0.01 ± 0.00 |
| **94.** | 1514 | 1528 | 13.64 | *γ*-cadinene | 39029-41-9 | 0.14 ± 0.01 | 0.01 ± 0.00 |
| **95.** | 1524 | 1535 | 13.73 | *δ*-cadinene | 483-76-1 | 0.10 ± 0.01 | 0.01 ± 0.00 |
| **96.** | 1540 | 1545 | 13.86 | *α*-cadinene | 17627-25-7 | 0.01 ± 0.00 | 0 |
| **97.** |  | 1551 | 13.92 | unknown compound |  | 0.03 ± 0.00 |  |
| **98.** |  | 1562 | 14.06 | unknown compound |  | 0.01 ± 0.00 | 0.00 ± 0.00 |
| **99.** |  | 1575 | 14.21 | unknown compound |  | 0.01 ± 0.00 | 0 |
| **100.** |  | 1582 | 14.3 | unknown compound |  | 0.01 ± 0.00 | 0.01 ± 0.00 |
| **101.** | 1572 | 1591 | 14.4 | germacren D-4-ol | 198991-79-6 | 0.13 ± 0.01 | 0.02 ± 0.00 |
| **102.** | 1585 | 1599 | 14.49 | (*E*)-(*Z*)-*α*-bisabolene epoxide |  | 0.13 ± 0.01 | 0.02 ± 0.00 |
| **103.** | 1599 | 1612 | 14.64 | salvial-4(14)-en-1-one | 73809-82-2 | 0.02 ± 0.00 | 0 |
| **104.** |  | 1626 | 14.8 | unknown compound |  | 0.01 ± 0.00 | 0 |
| **105.** |  | 1658 | 15.16 | unknown compound |  | 0.01 ± 0.00 | 0 |
| **106.** |  | 1668 | 15.27 | unknown compound |  | 0.02 ± 0.00 | 0 |
| **107.** |  | 1691 | 15.53 | unknown compound |  | 0.02 ± 0.00 | 0 |
| **108.** | 1700 | 1698 | 15.62 | heptadecane |  | 0.02 ± 0.00 | 0 |
| **109.** |  | 1715 | 15.8 | unknown compound |  | 0.09 ± 0.01 | 0 |
| **110.** |  | 1727 | 15.94 | unknown compound |  | 0.02 ± 0.00 | 0 |
| **111.** | 1728 | 1733 | 16 | 2,6-diisopropylnaphthalene | 24157-81-1 | 0 | 0.00 ± 0.00 |
| **112.** |  | 1737 | 16.08 | unknown compound |  | 0 | 0.01 ± 0.00 |
| **113.** |  | 1755 | 16.23 | unknown compound |  | 0.01 ± 0.00 | 0 |
| **114.** |  | 1762 | 16.3 | unknown compound |  | 0.03 ± 0.00 | 0 |
| **115.** |  | 1798 | 16.7 | unknown compound |  | 0.01 ± 0.00 | 0.01 ± 0.00 |
| **116.** |  | 1800 | 17.59 | unknown compound |  | 0 | 0.01 ± 0.00 |
| **117.** |  | 1802 | 17.64 | unknown compound |  | 0 | 0.04 ± 0.00 |
| **118.** |  | 1805 | 17.77 | unknown compound |  | 0.02 ± 0.00 | 0 |
| **119.** |  | 1834 | 17.06 | unknown compound |  | 0.01 ± 0.00 | 0 |
| **120.** |  | 1845 | 17.17 | unknown compound |  | 0.01 ± 0.00 | 0 |
| **121.** |  | 1865 | 17.38 | unknown compound |  | 0.02 ± 0.00 | 0 |
| **122.** |  | 1899 | 17.75 | unknown compound |  | 0 | 0.01 ± 0.00 |
| **123.** |  | 1916 | 17.9 | unknown compound |  | 0.16 ± 0.01 | 0 |
| **124.** |  | 1920 | 17.93 | unknown compound |  | 0 | 0.01 ± 0.00 |
| **125.** |  | 1931 | 18.04 | unknown compound |  | 0.05 ± 0.00 | 0 |
| **126.** |  | 1946 | 18.19 | unknown compound |  | 0.03 ± 0.00 | 0 |
| **127.** |  | 1962 | 18.35 | unknown compound |  | 0.01 ± 0.00 | 0 |
| **128.** |  | 1968 | 18.4 | unknown compound |  | 0.12 ± 0.02 | 0 |
| **129.** |  | 1972 | 18.42 | unknown compound |  | 0 | 0.01 ± 0.00 |
| **130.** |  | 1978 | 18.5 | unknown compound |  | 0.03 ± 0.00 | 0 |
| **131.** |  | 1985 | 18.57 | unknown compound |  | 0.24 ± 0.02 | 0 |
| **132.** |  | 1992 | 18.64 | unknown compound |  | 0.01 ± 0.00 | 0 |
| **133.** |  | 1995 | 18.74 | unknown compound |  | 0.02 ± 0.00 | 0 |
| **134.** |  |  | 18.79 | unknown compound |  | 0.02 ± 0.00 | 0 |
| **135.** |  |  | 18.84 | unknown compound |  | 0.04 ± 0.00 | 0 |
| **136.** |  |  | 18.91 | unknown compound |  | 0.02 ± 0.00 | 0 |
| **137.** |  |  | 19.04 | unknown compound |  | 0.01 ± 0.00 | 0 |
| **138.** |  |  | 19.09 | unknown compound |  | 0.02 ± 0.00 | 0.02 ± 0.00 |
| **139.** |  |  | 19.19 | unknown compound |  | 0.01 ± 0.00 | 0 |
| **140.** |  |  | 19.24 | unknown compound |  | 0 | 0.03 ± 0.00 |
| **141.** |  |  | 19.33 | unknown compound |  | 0.04 ± 0.00 | 0 |
| **142.** |  |  | 19.39 | unknown compound |  | 0.01 ± 0.00 | 0 |
| **143.** |  |  | 19.64 | unknown compound |  | 0 | 0.02 ± 0.00 |
| **144.** |  |  | 19.8 | unknown compound |  | 0.16 ± 0.01 |  |
| **145.** |  |  | 20.02 | unknown compound |  |  | 0.01 ± 0.00 |
| **146.** |  |  | 20.27 | unknown compound |  |  | 0.01 ± 0.00 |
| **147.** |  |  | 20.21 | unknown compound |  | 0.01 ± 0.00 | 0 |
| **148.** |  |  | 20.34 | unknown compound |  | 0 | 0.05 ± 0.01 |
| **149.** |  |  | 20.36 | unknown compound |  | 0 | 0.09 ± 0.00 |
| **150.** |  |  | 20.45 | unknown compound |  | 0.01 ± 0.00 | 0 |
| **151.** |  |  | 20.64 | unknown compound |  | 0.01 ± 0.00 | 0 |
| **152.** |  |  | 20.8 | unknown compound |  | 0 | 0.01 ± 0.00 |
| **153.** |  |  | 20.83 | unknown compound |  | 0.01 ± 0.00 | 0.04 ± 0.00 |
| **154.** |  |  | 20.99 | unknown compound |  | 0 | 0.01 ± 0.00 |
| **155.** |  |  | 21.04 | unknown compound |  | 0 | 0.02 ± 0.00 |
| **156.** |  |  | 21.12 | unknown compound |  | 0 | 0.01 ± 0.00 |
| **157.** |  |  | 21.22 | unknown compound |  | 0 | 0.01 ± 0.00 |
| **158.** |  |  | 21.31 | unknown compound |  | 0 | 0.01 ± 0.00 |
| **159.** |  |  | 21.4 | unknown compound |  | 0 | 0.01 ± 0.00 |
| **160.** |  |  | 21.43 | unknown compound |  | 0 | 0.00 ± 0.00 |
| **161.** |  |  | 21.56 | unknown compound |  | 0.08 ± 0.01 | 0 |
| **162.** |  |  | 21.66 | unknown compound |  | 0 | 0.01 ± 0.00 |
| **163.** |  |  | 21.73 | unknown compound |  | 0 | 0.02 ± 0.00 |
| **164.** |  |  | 21.82 | unknown compound |  | 0 | 0.13 ± 0.00 |
| **165.** |  |  | 22.06 | unknown compound |  | 0 | 0.01 ± 0.00 |
| **166.** |  |  | 22.21 | unknown compound |  | 0 | 0.01 ± 0.00 |
| **167.** |  |  | 22.33 | unknown compound |  | 0 | 0.01 ± 0.00 |
| **168.** |  |  | 22.53 | unknown compound |  | 0 | 0.04 ± 0.00 |
| **169.** |  |  | 22.65 | unknown compound |  | 0 | 0.10 ± 0.01 |
| **170.** |  |  | 22.85 | unknown compound |  | 0 | 0.00 ± 0.00 |
| **171.** |  |  | 23.01 | unknown compound |  | 0 | 0.18 ± 0.01 |
| **172.** |  |  | 23.15 | unknown compound |  | 0 | 0.01 ± 0.00 |
| **173.** |  |  | 23.17 | unknown compound |  | 0.04 ± 0.00 | 0 |
| **174.** |  |  | 23.29 | unknown compound |  | 0 | 0.09 ± 0.00 |
| **175.** |  |  | 23.5 | unknown compound |  | 0.02 ± 0.00 | 0 |
| **176.** |  |  | 23.53 | unknown compound |  | 0 | 1.17 ± 0.11 |
| **177.** |  |  | 23.62 | unknown compound |  | 0 | 0.03 ± 0.00 |
| **178.** |  |  | 23.85 | unknown compound |  | 0 | 0.06 ± 0.00 |
| **179.** |  |  | 24.11 | unknown compound |  | 0 | 15.92 ± 1.88 |
| **180.** |  |  | 24.35 | unknown compound |  | 0 | 1.06 ± 0.08 |
| **181.** |  |  | 24.43 | unknown compound |  | 0 | 0.72 ± 0.02 |
| **182.** |  |  | 24.81 | unknown compound |  | 0 | 0.72 ± 0.07 |
| **183.** |  |  | 25.04 | unknown compound |  | 0.01 ± 0.00 | 0 |
| **184.** |  |  | 25.17 | unknown compound |  | 0 | 3.23 ± 0.23 |
| **185.** |  |  | 25.5 | unknown compound |  | 0 | 8.33 ± 0.64 |
| **186.** |  |  | 25.64 | unknown compound |  | 0 | 0.19 ± 0.02 |
| **187.** |  |  | 25.74 | unknown compound |  | 0 | 0.02 ± 0.00 |
| **188.** |  |  | 25.86 | unknown compound |  | 0 | 0.04 ± 0.00 |
| **189.** |  |  | 25.9 | unknown compound |  | 0 | 0.03 ± 0.00 |
| **190.** |  |  | 26.05 | unknown compound |  | 0 | 0.14 ± 0.01 |
| **191.** |  |  | 26.43 | unknown compound |  | 0 | 0.94 ± 0.07 |
| **192.** |  |  | 26.8 | unknown compound |  | 0 | 0.16 ± 0.02 |
| **193.** |  |  | 27.12 | unknown compound |  | 0 | 0.06 ± 0.00 |
| **194.** |  |  | 27.34 | unknown compound |  | 0 | 0.06 ± 0.00 |
| **195.** |  |  | 27.51 | unknown compound |  | 0 | 0.01 ± 0.00 |
| **196.** |  |  | 27.56 | unknown compound |  | 0 | 0.01 ± 0.00 |
| **197.** |  |  | 27.82 | unknown compound |  | 0 | 0.26 ± 0.02 |
| **198.** |  |  | 28.08 | unknown compound |  | 0 | 0.04 ± 0.00 |
| **199.** |  |  | 28.3 | unknown compound |  | 0 | 0.04 ± 0.00 |
| **200.** |  |  | 28.75 | unknown compound |  | 0 | 0.19 ± 0.02 |
| **201.** |  |  | 29.37 | unknown compound |  | 0 | 0.01 ± 0.00 |
| **202.** |  |  | 29.46 | unknown compound |  | 0 | 0.03 ± 0.00 |
| **203.** |  |  | 30.13 | unknown compound |  | 0 | 0.13 ± 0.02 |
| **204.** |  |  | 30.87 | unknown compound |  | 0 | 0.09 ± 0.00 |
| **205.** |  |  | 31.16 | unknown compound |  | 0 | 0.01 ± 0.00 |
| **206.** |  |  | 31.51 | unknown compound |  | 0 | 0.10 ± 0.01 |
| **207.** |  |  | 31.91 | unknown compound |  | 0 | 0.52 ± 0.06 |
| **208.** |  |  | 32.42 | unknown compound |  | 0 | 0.03 ± 0.00 |

**Table S2:** Results of multiple Chi-square tests between experimental trials

| Germacrene – Control paper: | [X2(2)=26.6 p<0.001, N=39; Cramer's V = 0.826] |
| --- | --- |
| Germacrene – Visual stimulus: | [X2(2)=28.997 p<0.001, N=40; Cramer's V = 0.851] |
| Germacrene – Odour stimulus: | [X2(2)=31.757 p<0.001, N=39; Cramer's V = 0.902] |
| Visual stimulus – Control paper: | [X2(2)= 25.774 p<0.001, N=39 Cramer's V = 0.813] |
| Visual stimulus – Odour stimulus: | [X2(1)=0.975 p=0.323, N=39; Cramer's V = 0.158] |
| Odour stimulus – Control paper: | [X2(1)=24.783 p<0.001 N=38; Cramer's V = 0.808] |

**Table S3:** Result of Dunn’s Post hoc test between tested groups

| Control paper – x Odour stimulus: | z = -1.23, p = 1 | x Odour stimulus – x Visual stimulus: | z = -3.7, p = 0.002 |
| --- | --- | --- | --- |
| Control paper – Odour stimulus: | z = -3.20, p = 0.013 | x Odour stimulus – Visual stimulus: | z = 5.47, p < 0.001 |
| Control paper – x Visual stimulus: | z = -4.88, p < 0.001 | Odour stimulus – x Visual stimulus: | z = -1.63, p = 1 |
| Control paper – Visual stimulus: | z = -6.63, p < 0.001 | Odour stimulus – Visual stimulus: | z = 3.38, p = 0.007 |
| x Odour stimulus – Odour stimulus: | z = 2.02, p = 0.432 | x Visual stimulus – Visual stimulus: | z = 1.77, p = 0.764 |
